# Supplementary material
Source: PubMed Central journal article supplement (PMC5762164)
Supplement: sc7b03026_si_001.pdf [file sc7b03026_si_001.pdf]

**Understanding the Effect of the Dianhydride Structure on the Properties of Semi-aromatic Polyimides  
Containing a Biobased Fatty Diamine**

Arijana Susa<sup>†\*</sup>, Johan Bijleveld<sup>†</sup>, Marianella Hernandez Santana<sup>†‡</sup>, Santiago J. Garcia<sup>†</sup>

<sup>†</sup> Novel Aerospace Materials group, Faculty of Aerospace Engineering  
Delft University of Technology, Kluyverweg 1, 2629 HS, Delft, The Netherlands

<sup>‡</sup> Currently at Institute of Polymer Science and Technology (ICTP-CSIC)  
Juan de la Cierva, 3, 28006, Madrid, Spain

*\*e-mail: [a.susa@tudelft.nl](mailto:a.susa@tudelft.nl)*

**Number of Pages:** 10 (S1 to S10)

**Number of Figures:** 8

**Number of Tables:** 1

*List of figures and tables:*

*Page No.:*

|                   |                                                                                                                                        |                |
|-------------------|----------------------------------------------------------------------------------------------------------------------------------------|----------------|
| <b>Figure S1.</b> | <sup>1</sup> H NMR spectra of the four polymers in CDCl <sub>3</sub> and their assignment to the molecular structure.                  | <b>S2 – S4</b> |
| <b>Figure S2.</b> | TGA curves showing weight loss with temperature of the four PIs in the as synthesized state.                                           | <b>S5</b>      |
| <b>Figure S3.</b> | DSC traces of the second heating curves, showing glass transitions of the four PIs in the as synthesized state.                        | <b>S5</b>      |
| <b>Figure S4.</b> | Normalized dielectric loss ( $\epsilon''$ ) of PI samples with different dianhydrides at selected temperatures (25, 40, 50 and 70 °C). | <b>S6</b>      |
| <b>Figure S5.</b> | Temperature dependence of the average relaxation time for the segmental mode of PIs.                                                   | <b>S7</b>      |
| <b>Figure S6.</b> | Arrhenius plots of the time-temperature superposition shift factors $a_T$ for the glass transition relaxations of the four PIs.        | <b>S8</b>      |
| <b>Table S1.</b>  | Activation energies for the glass transition relaxations.                                                                              | <b>S8</b>      |
| <b>Figure S7.</b> | Polarized microscopy images of the BPDA-D polymer showing the increase in birefringence with annealing time.                           | <b>S9</b>      |
| <b>Figure S8.</b> | SAXS diffractograms of BPDA-D polymer showing the annealing effect on the structural ordering.                                         | <b>S10</b>     |

**Yield**

Percent yield of the polymer was calculated according to equation:

$$\text{Percent yield (\%)} = 100 \left( \frac{\text{Actual mass of the product}}{\text{Predicted mass of the product}} \right) \quad (\text{Eq. S1})$$

where predicted mass of the product was calculated according to the stoichiometric balance, assuming that 1 mol of a dianhydride (DAh) and 1 mol of DD1 give 1 mol of PI and 2 mol of water (4.25 wt% of water):

$$\text{Predicted mass of the product/g} = m(\text{DAh}) + m(\text{DD1}) - m(\text{H}_2\text{O}) \quad (\text{Eq. S2})$$

**<sup>1</sup>H NMR spectra**

Solution state <sup>1</sup>H NMR spectra were collected using the Agilent-400 MR DD2 at 25°C at 400 MHz. The solutions of polymers were prepared in CDCl<sub>3</sub>. Spectra were referenced to the solvent residual peak for TMS. Spectra were not normalized.

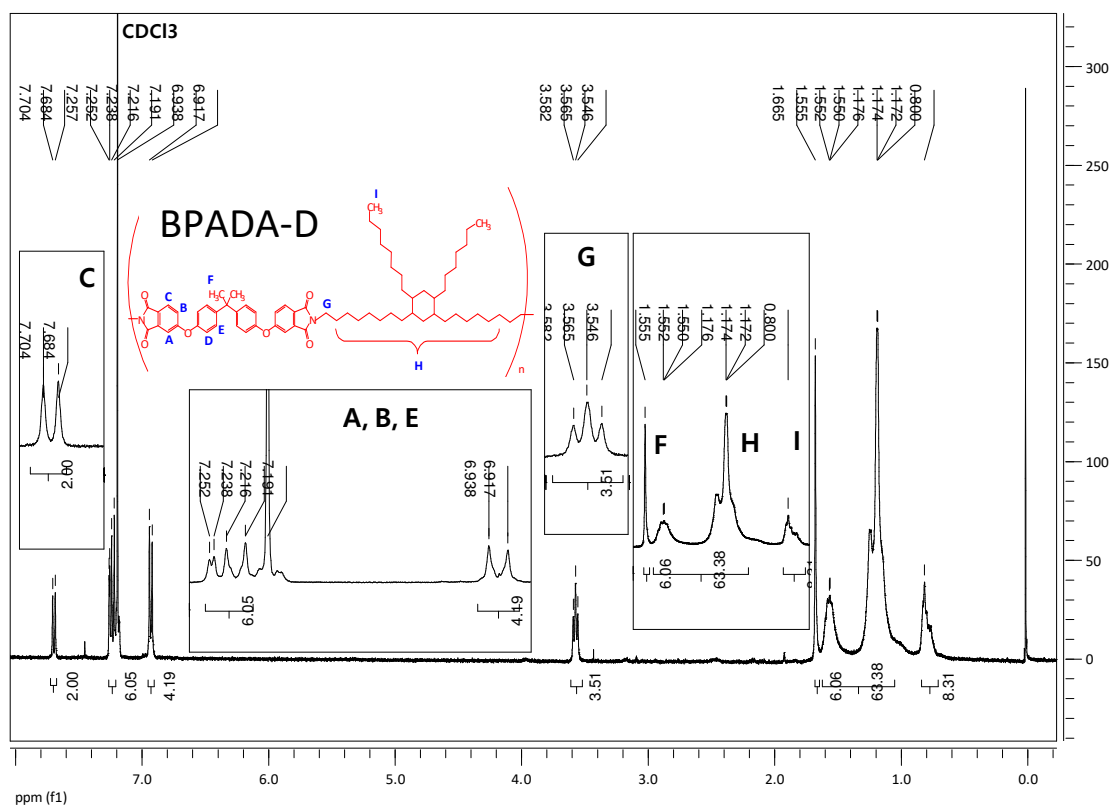

SUPPORTING INFORMATION

Susa et al. 2017

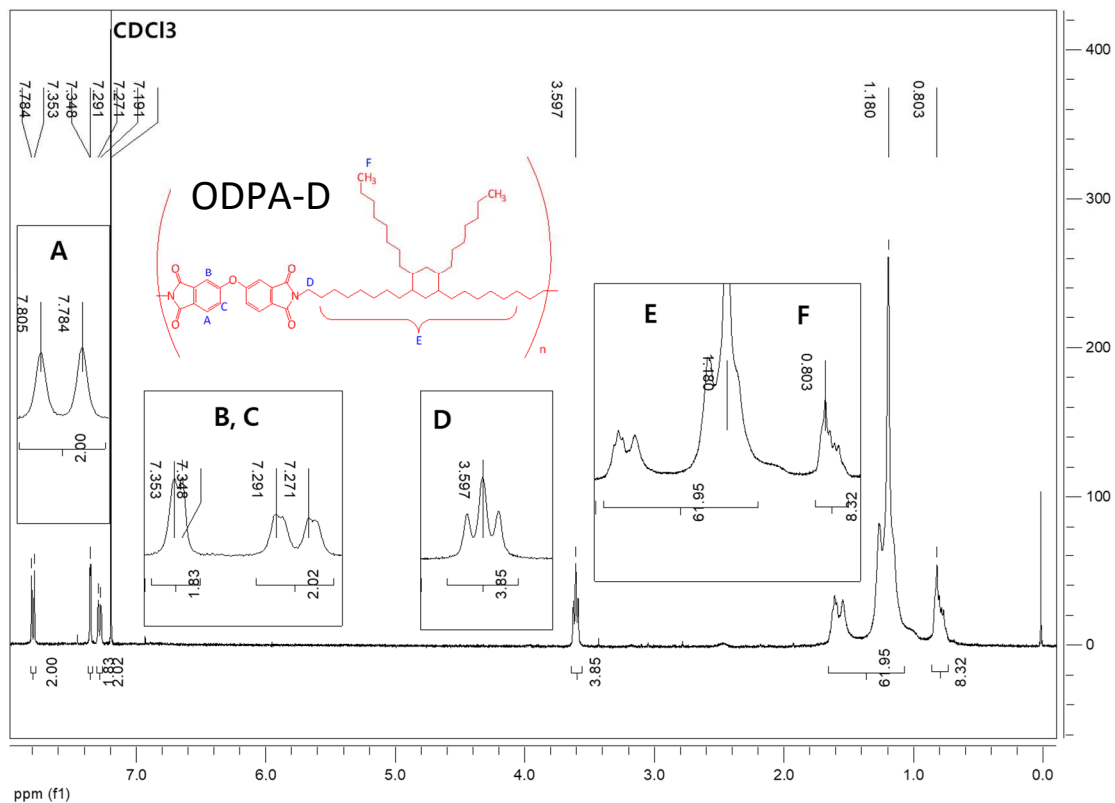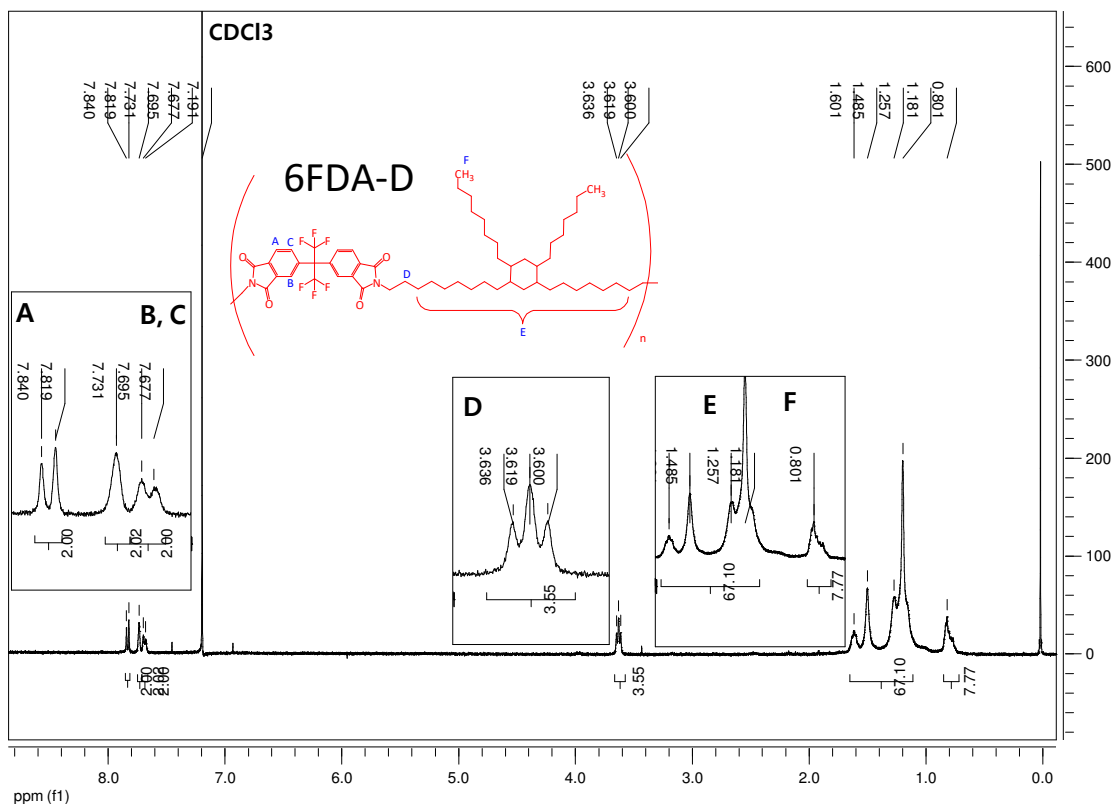

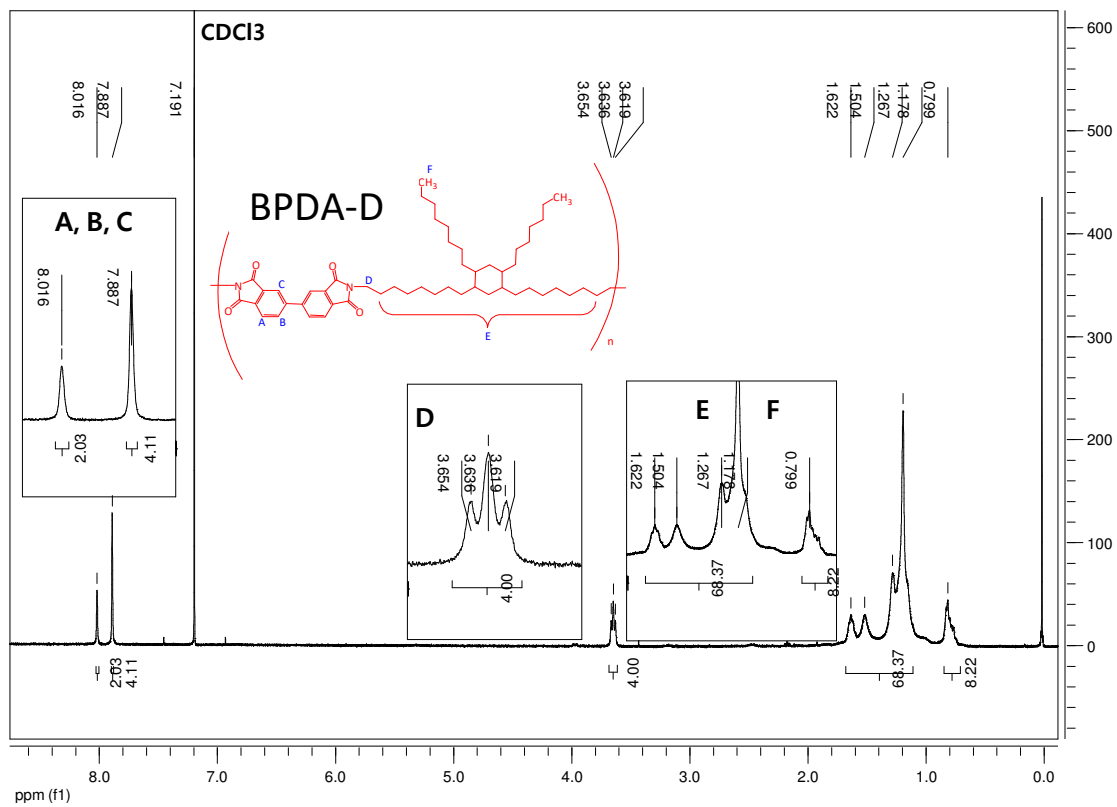

**Figure S1.** <sup>1</sup>H NMR spectra of the four polymers in CDCl<sub>3</sub> and their assignment to the molecular structure.

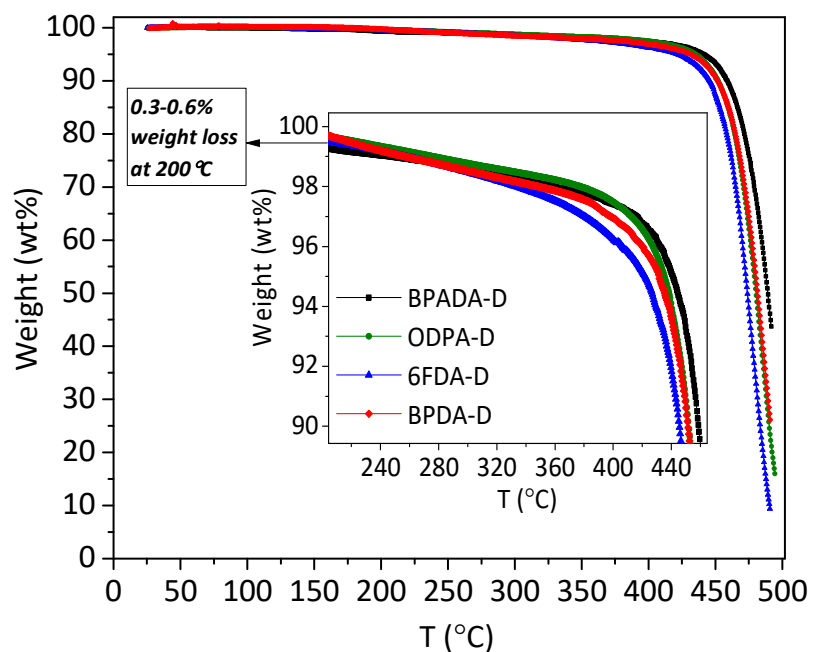

**Figure S2.** TGA curves showing weight loss (wt%) with temperature of the four PIs in the as synthesized state.

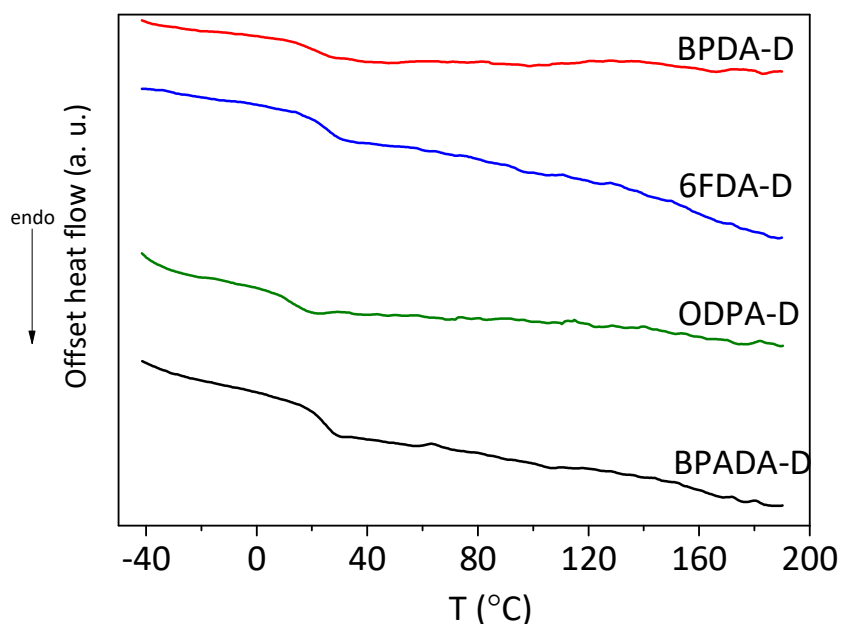

**Figure S3.** DSC traces of the second heating curves, showing glass transitions of the four PIs in the as synthesized state.

Broadband dielectric spectroscopy (BDS) analysis

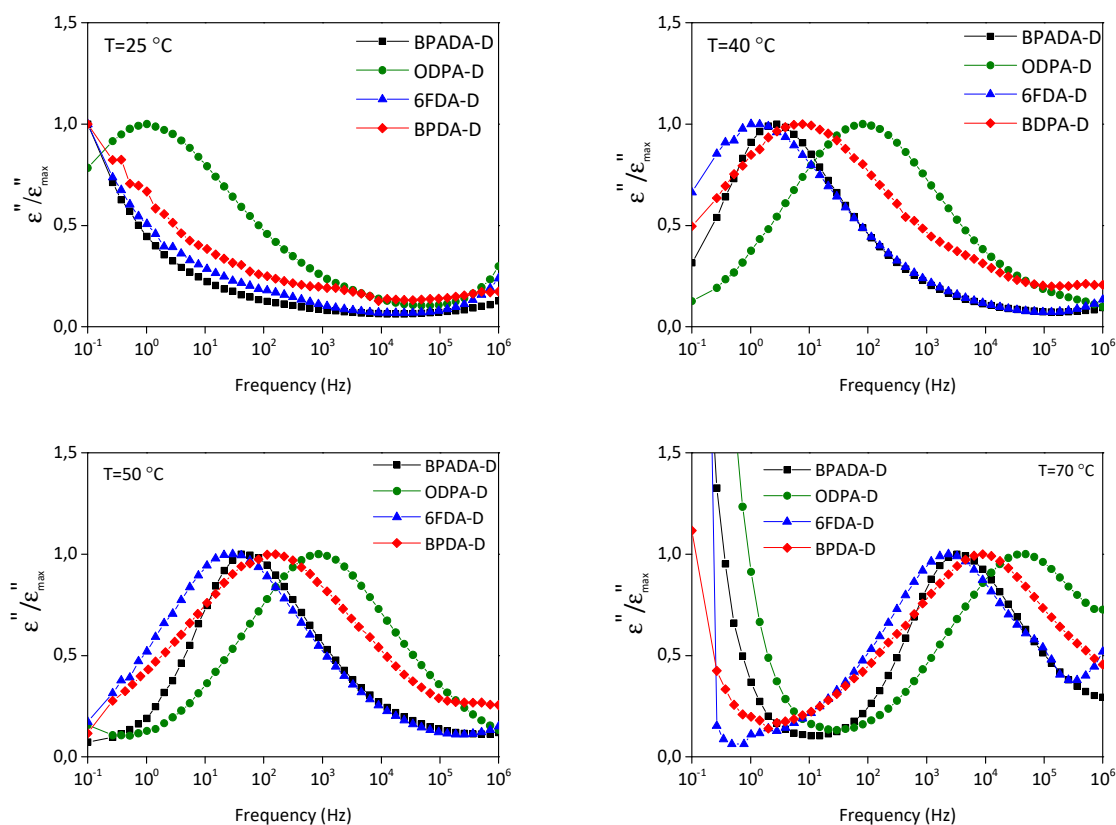

**Figure S4.** Normalized dielectric loss ( $\epsilon''$ ) of PI samples with different dianhydrides at selected temperatures (25 , 40, 50 and 70 °C).

The dielectric relaxation processes were analyzed quantitatively by fitting the frequency spectra to the Havriliak-Negami (HN) function<sup>1,2</sup> given by:

$$\epsilon^*(\omega) = \epsilon_{\infty} + \frac{\Delta\epsilon}{[1+(i\omega\tau_{HN})^b]^c} \quad (\text{Eq.S3})$$

The difference in dielectric constant measured at low and high frequencies is the *dielectric strength* ( $\Delta\epsilon$ ) of the relaxation and it is related to the area under the absorption curve given by ( $\Delta\epsilon = \epsilon_s - \epsilon_{\infty}$ ), where  $\epsilon_{\infty}$  and  $\epsilon_s$  are the unrelaxed and relaxed values of the dielectric constant respectively.  $\tau_{HN}$  is the HN relaxation time, representing the most probable relaxation time of the relaxation time distribution function,<sup>3</sup> and  $b$  and  $c$  are shape parameters ( $0 < b, c \leq 1$ ) which describe the symmetric and the asymmetric broadening of the equivalent relaxation time distribution function, respectively. Parameters  $b$  and  $c$  can be associated to the structure and polymer architecture heterogeneity with respect to the bulk polymer.

The HN relaxation time  $\tau_{HN}$  is related to the frequency of maximum loss,  $f_{\max} = 1/(2\pi\tau_{\max})$ , by the following equation:<sup>4</sup>

$$\tau_{\max} = \frac{1}{2\pi f_{\max}} = \tau_{\text{HN}} \left( \sin \frac{b\pi}{2+2c} \right)^{-1/b} \left( \sin \frac{bc\pi}{2+2c} \right)^{1/b} \quad (\text{Eq. S4})$$

Both characteristic relaxation times coincide when the relaxation spectrum is symmetric, *i.e.*  $c=1$ .

The temperature dependence of the segmental relaxation times ( $\tau_{\max}$ ) was also studied. This dependency is well stated by the Vogel-Fulcher-Tammann (VFT) equation:<sup>5-8</sup>

$$\tau_{\max} = \tau_0 \exp \left( \frac{B}{T-T_0} \right) \quad (\text{Eq. S5})$$

where  $\tau_0$  and  $B$  are temperature-independent parameters, and  $T_0$  is the so-called ideal glass transition or Vogel temperature which is found to be 30-70 K below  $T_g$ .<sup>9</sup> To reduce the effect of misleading parameters on data fitting to the VFT equation over a limited frequency range, a value of  $\tau_0 \approx 10^{-14}$  s was assumed, according to the values empirically found for many polymer systems lying between  $10^{-14}$  and  $10^{-12}$ . The dependence of  $\tau_{\max}$  with temperature is depicted in Figure S5. This temperature dependency shows a clear curvature typical for cooperative motions.

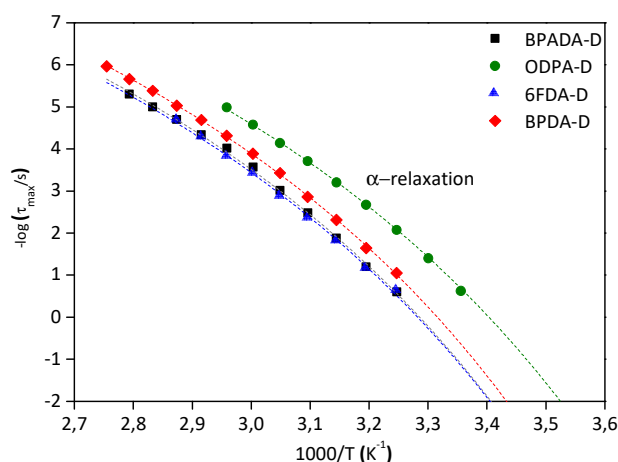

**Figure S5.** Temperature dependence of the average relaxation time for the segmental mode of PIs. Dotted lines correspond to the VFT fit.

<sup>1</sup> Kremer, F.; Schönhal, A., *Broadband Dielectric Spectroscopy*. Springer: New York, **2003**; p 721.

<sup>2</sup> Havriliak, S.; Negami, S., A Complex Plane Representation of Dielectric and Mechanical Relaxation Processes in Some Polymers. *Polymer* **1967**, *8* (4), 161-210. DOI: 10.1016/0032-3861(67)90021-3

<sup>3</sup> Böttcher, C. J. F.; Bordewijk, P., *Theory of Electric Polarization*. Elsevier: **1978**; Vol. II.

<sup>4</sup> Richert, R.; Angell, C. A., Dynamics of Glass-forming Liquids. V. On the Link Between Molecular Dynamics and Configurational Entropy. *J Chem Phys* **1998**, *108* (21), 9016-9026. DOI: 10.1063/1.476348

<sup>5</sup> Fulcher, G. S., Analysis of Recent Measurements of the Viscosity of Glasses. *J Am Ceram Soc* **1925**, *8* (6), 339-355. DOI: 10.1111/j.1151-2916.1925.tb16731.x

<sup>6</sup> Vogel, H., The Temperature Dependence Law of the Viscosity of Fluids. *Physikalische Zeitschrift* **1921**, *22*, 645-646.

<sup>7</sup> Tammann, G.; Hesse, W., The Dependency of Viscosity on Temperature in Hypothermic Liquids. *Zeitschrift Fur Anorganische Und Allgemeine Chemie* **1926**, *156* (4).

<sup>8</sup> Bohmer, R.; Ngai, K. L.; Angell, C. A.; Plazek, D. J., Nonexponential Relaxations in Strong and Fragile Glass Formers. *J Chem Phys* **1993**, *99* (5), 4201-4209. DOI: 10.1063/1.466117

<sup>9</sup> Fischer, E. W., Light-scattering and Dielectric Studies on Glass-forming Liquids. *Physica A* **1993**, *201* (1-3), 183-206. DOI: 10.1016/0378-4371(93)90416-2

**Activation energies for the glass transition relaxations**

From the shift factors obtained from the TTS mastercurves, the Arrhenius plots ( $\ln a_T$  vs  $1000/T$ ) were constructed and the activation energies were calculated from the slopes of the linear fit according to the Arrhenius equation:<sup>10</sup>

$$a_T = \exp\left[\frac{E_a}{R}\left(\frac{1}{T} - \frac{1}{T_{ref}}\right)\right] \quad (\text{Eq. S6})$$

Where  $a_T$  is the shift factor,  $E_a$  is the activation energy,  $R$  is the gas constant and  $T_{ref}$  is the reference temperature at which the mastercurve is constructed.

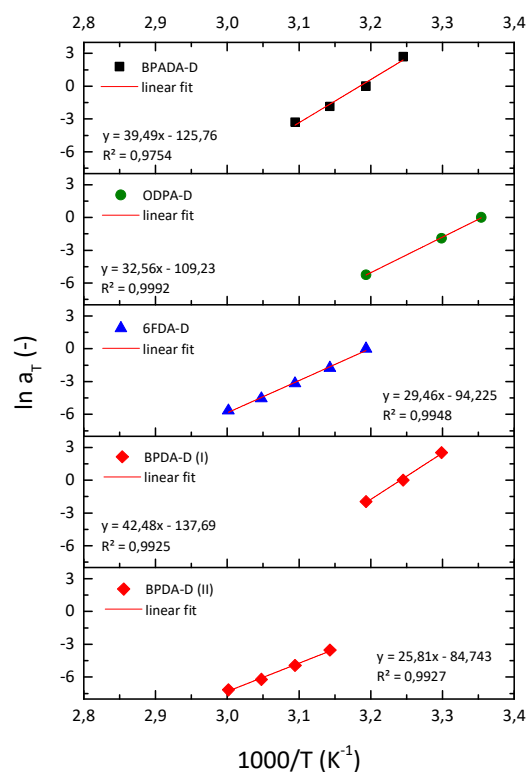

**Figure S6.** Arrhenius plots of the time-temperature superposition shift factors  $a_T$  for the glass transition relaxations of the four PIs. Note that BPADA-D shows two  $T_g$  relaxations (I and II) while the other three polymers show only one.

$$T_{ref} = T(\tan \delta_{MAX}) = T_g.$$

**Table S1.** Activation energies for the glass transition relaxations

| Polymer | Relaxation process | $E_a$ / $\text{kJmol}^{-1}$ |
|---------|--------------------|-----------------------------|
| BPADA-D | $T_g$              | 328                         |
| ODPA-D  | $T_g$              | 271                         |
| 6FDA-D  | $T_g$              | 245                         |
| BPADA-D | $T_g$ (I)          | 353                         |
|         | $T_g$ (II)         | 215                         |

<sup>10</sup> Wood-Adams, P.; Costeux, S., Thermorheological Behavior of Polyethylene: Effects of Microstructure and Long Chain Branching. *Macromolecules* **2001**, *34* (18), 6281-6290. DOI: 10.1021/ma0017034



Birefringence with annealing time

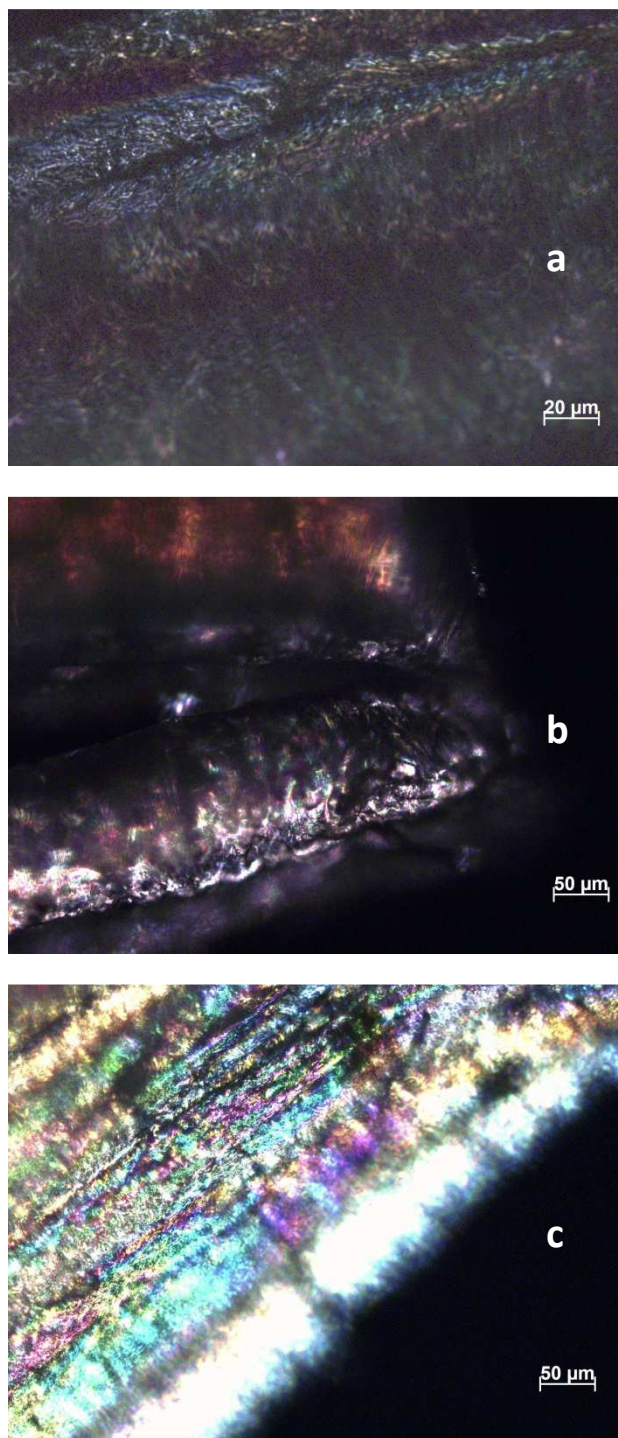

**Figure S7.** Polarized microscopy images of the BPDA-D polymer showing the increase in birefringence with annealing time for a) non-annealed, b) 5 days annealed and c) 11 days annealed samples.

## SAXS measurements

The SAXS diffractograms were collected using Anton Paar SAXSess, with a copper tube operated at 40 mA, 40 kV, using a multilayer mirror for focusing and monochromatisation of the emitted X-ray beam. The detector is a Dectris Mythen photon counting strip detector. The samples have been measured for 20 minutes each, with the sample mounted on a holder in vacuum. The data was corrected for dark-current, transmission and a background (empty holder subtracted). The data was subsequently desmeared using a procedure available in the SAXSQuant software. The data was then regrouped or rebinned to reduce the number of datapoints and noise, taking care to propagate the uncertainties. The separation distances,  $d$ , are calculated according to  $d=2\pi/q$ .<sup>11</sup>

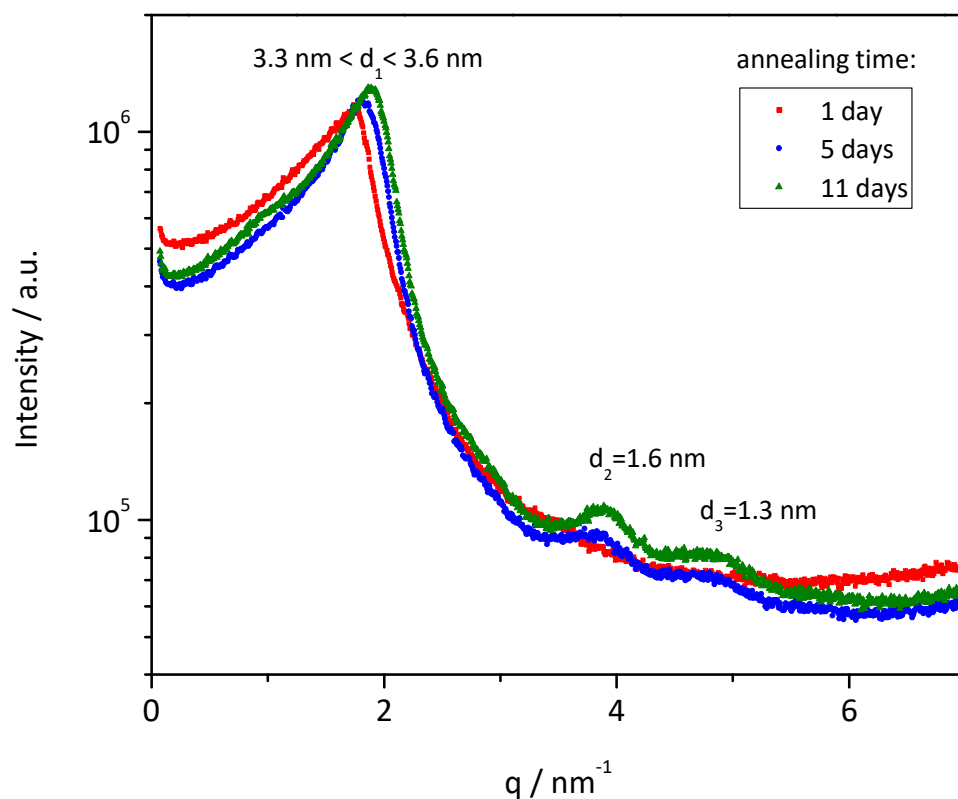

**Figure S8.** SAXS diffractograms of BPDA-D polymer that was annealed at  $T_{\text{ann}}=T(\tan \delta_{\text{MAX}})=T_g$  for different times: 1 day (red squares), 5 days (blue circles) and 11 days (green triangles). The annealed samples show two additional peaks that indicate nanophase separation. The calculated separation distances,  $d$ , are assigned to each peak.

<sup>11</sup> Beiner, M.; Huth, H., Nanophase Separation and Hindered Glass Transition in Side-chain Polymers. *Nat Mater* **2003**, 2 (9), 595-599. DOI: 10.1038/nmat966
